# Supplementary material for: Assessing Viral Abundance and Community Composition in Four Contrasting Regions of the Southern Ocean
Source: PubMed Central journal article supplement (PMC7400478; doi:10.3390/life10070107), 2020-07-05
Supplement: life-10-00107-s001.pdf [file life-10-00107-s001.pdf]

# Supplementary Materials of Assessing Viral Abundance and Community Composition in Four Contrasting Regions of the Southern Ocean

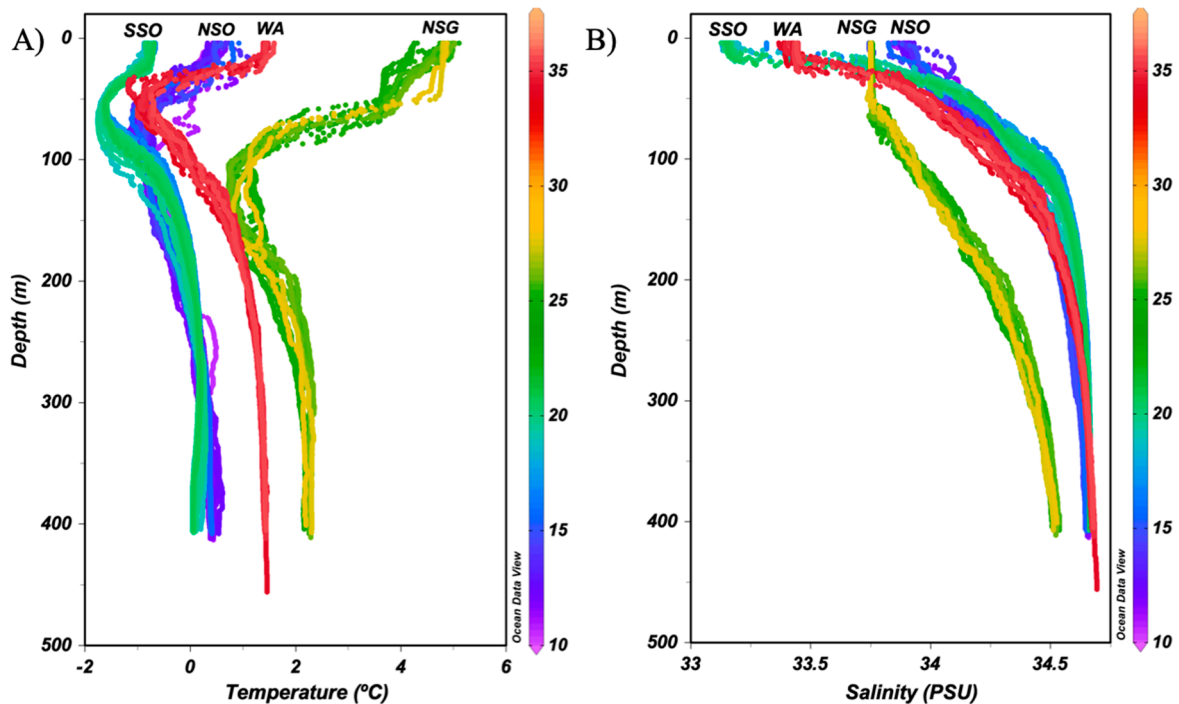

**Figure S1.** Temperature and salinity profiles. Profiles of (A) Temperature, and (B) Salinity from the four regions registered during the PEGASO expedition. The color indicates different sampling days. See the explanation in Figure 1 for acronyms.

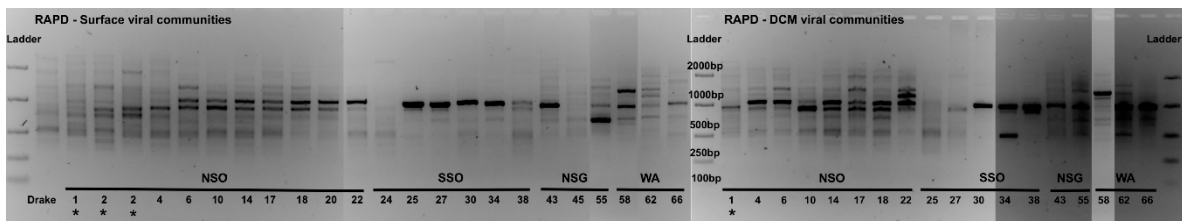

**Figure S2.** Randomly amplified polymorphic DNA gel image. Gel electrophoresis from viral DNA concentrates from the four regions and both depth layers (Surface and DCM). The numbers below each line indicate the station number. First, middle (indicated) and last lanes are the EasyLadder I (Ladder), Bioline. Molecular weight markers are indicated in base pairs (bp). Sharp differences on the gray shades are due to the side-merge of different gels images (several gels were run in order to work with the best quality gels). Asterisk (\*) indicates that those lanes (i.e. stations) were not used in the statistical analyses. See the explanation in Figure 1 for acronyms.

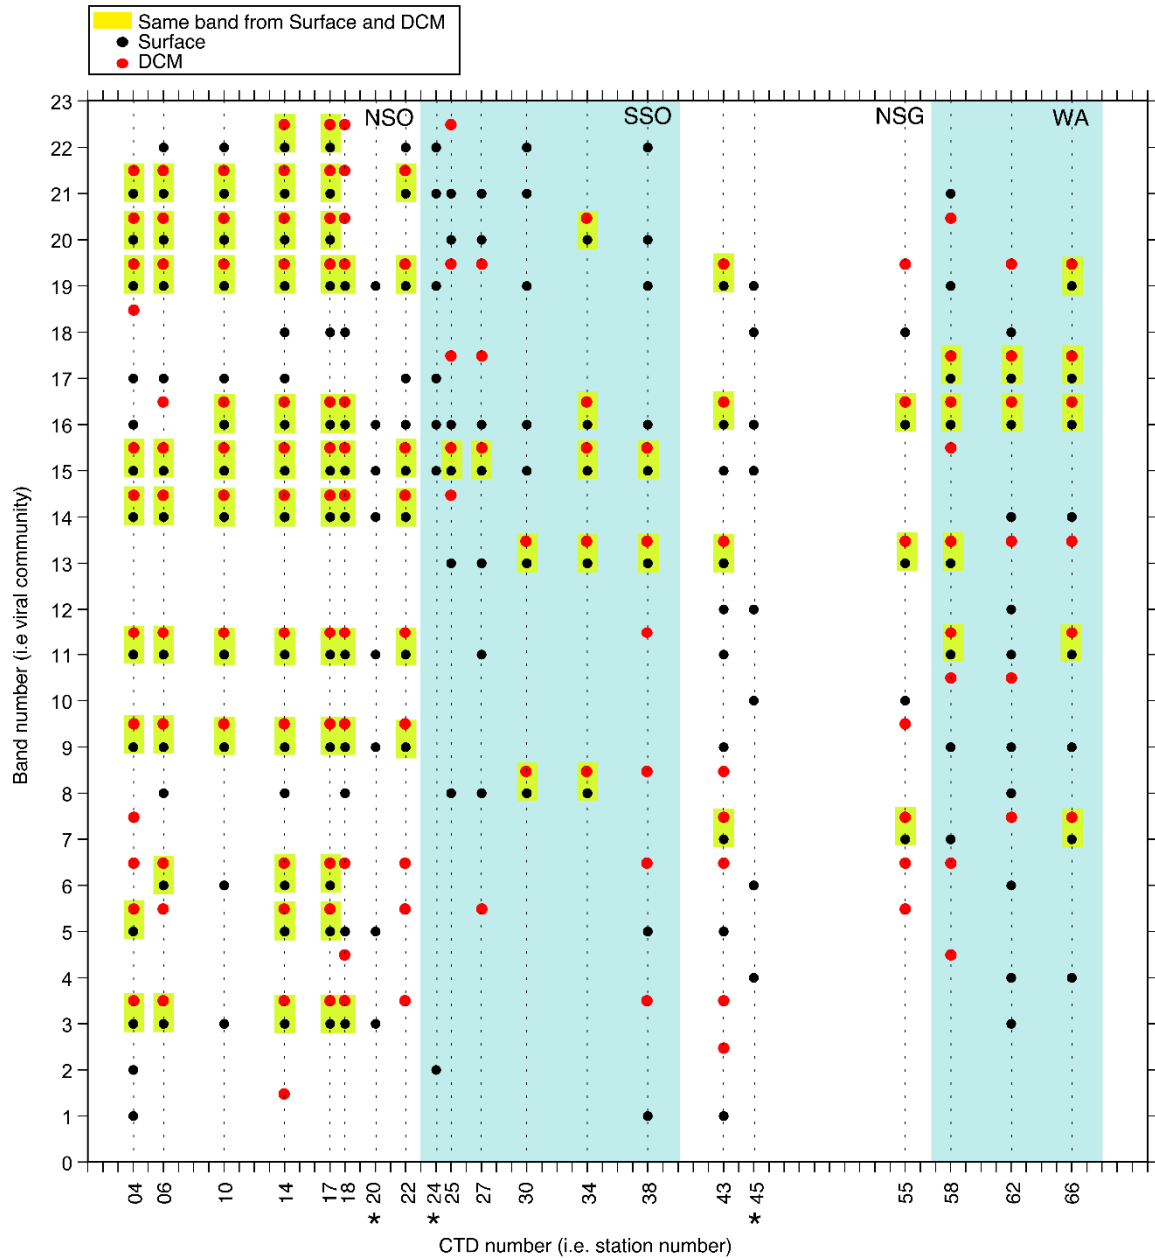

**Figure S3.** Viral community banding pattern. Summary of the band pattern obtained in the gel electrophoresis (Figure S2). The presence of bands at each station is depicted with a black dot (surface) and a red dot (DCM). When the same band showed up at both depth layers in the same station, a yellow box has been drawn. Asterisk (\*) indicates the stations where no diversity samples were measured at the DCM. See the explanation in Figure 1 for acronyms.

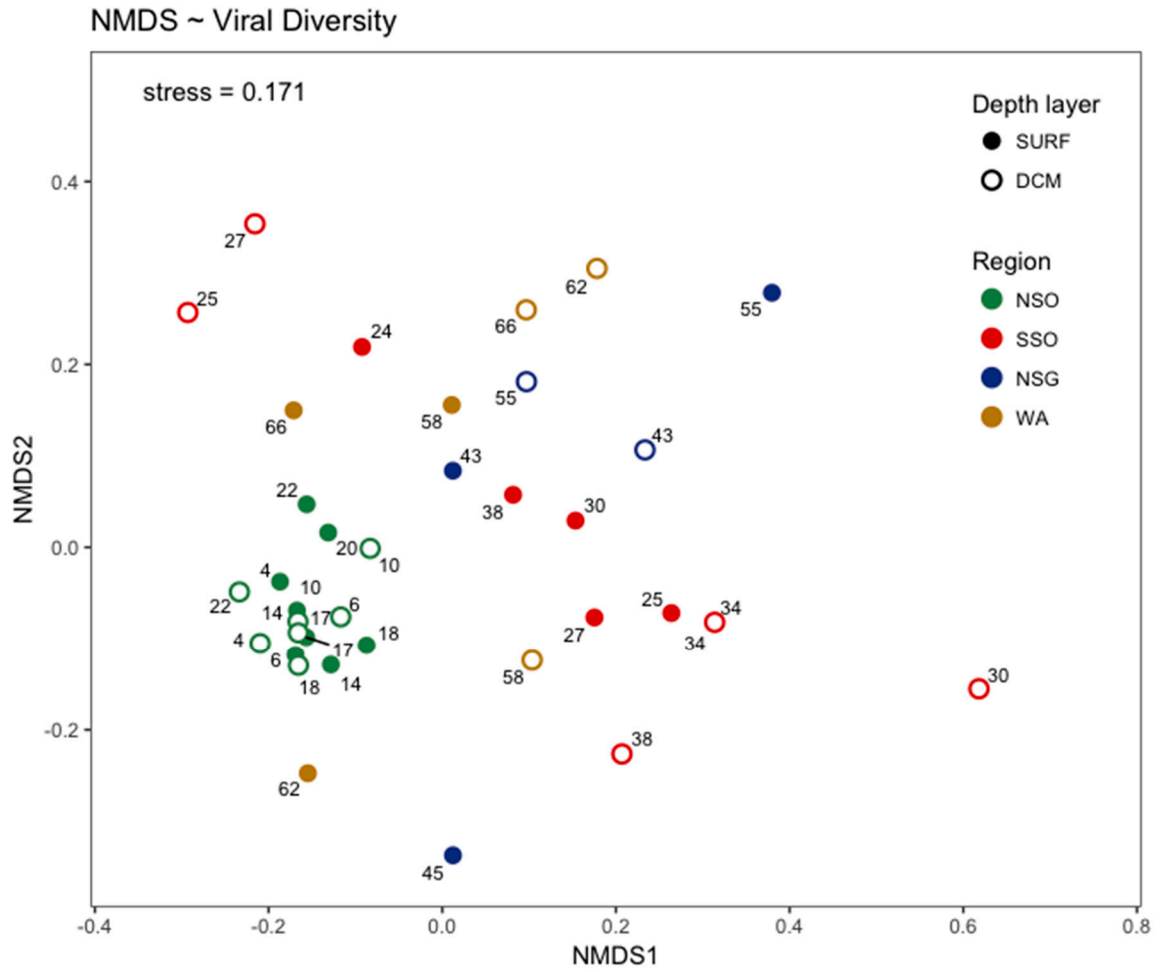

**Figure S4.** Non-Metric Multidimensional Scaling (NMDS) of the marine viral community composition from surface and DCM plotted together. Full dots represent surface communities and empty circles represent DCM samples. Numbers correspond to the station sampled. See explanation in Figure 1 for acronyms.

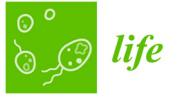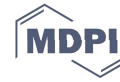

**Table 1.** Physicochemical variables measured during the PEGASO cruise. Sample code: station number and date. Lat (S): Latitude. Long (W): Longitude. Depth (m): surface -4m- and the DCM. Temperature, Salinity, Nutrients: nitrate ( $\text{NO}_3^-$ ), nitrite ( $\text{NO}_2^-$ ), ammonia ( $\text{NH}_4^+$ ), silicate ( $\text{SiO}_4^{2-}$ ), and phosphate ( $\text{PO}_4^{3-}$ ). FDOM: Fluorescence of Dissolved Organic Matter peak-t. See explanation in Figure 1 for acronyms.

| Sampling site | Sample code (PEGASO_station) |         | Depth (m) | Temperature ( $^{\circ}\text{C}$ ) | Salinity (PSU) | $\text{NO}_3^-$ ( $\mu\text{M}$ ) | $\text{NO}_2^-$ ( $\mu\text{M}$ ) | $\text{NH}_4^+$ ( $\mu\text{M}$ ) | $\text{SiO}_4^{2-}$ ( $\mu\text{M}$ ) | $\text{PO}_4^{3-}$ ( $\mu\text{M}$ ) | FDOM (R.U) |          |
|---------------|------------------------------|---------|-----------|------------------------------------|----------------|-----------------------------------|-----------------------------------|-----------------------------------|---------------------------------------|--------------------------------------|------------|----------|
|               | number_date[year/month/day]  | Lat (S) |           |                                    |                |                                   |                                   |                                   |                                       |                                      |            | Long (W) |
| NSO           | PGS_CTD3_150110              | 600021  | 460876    | 4                                  | 0.51           | 33.89                             | 28.215                            | 0.184                             | 0.209                                 | 47.05                                | 1.45       | 22.29    |
| NSO           | PGS_CTD4_150110              | 600082  | 460402    | 4                                  | 0.57           | 33.83                             | 29.979                            | 0.231                             | 1.369                                 | 45.77                                | 2.17       | 17.48    |
|               |                              | 600082  | 460402    | 68                                 | 0.11           | 34.15                             | -                                 | -                                 | -                                     | -                                    | -          | -        |
| NSO           | PGS_CTD6_150111              | 595873  | 460099    | 4                                  | 0.43           | 33.88                             | 28.646                            | 0.159                             | 0.238                                 | 44.48                                | 2.23       | 14.34    |
|               |                              | 595873  | 460099    | 45                                 | 0.65           | 34.08                             | -                                 | -                                 | -                                     | -                                    | -          | -        |
| NSO           | PGS_CTD7_150111              | 595853  | 460268    | 4                                  | 0.58           | 33.90                             | 27.022                            | 0.164                             | 0.571                                 | 44.90                                | 2.12       | 15.31    |
|               |                              | 595853  | 460268    | 38                                 | -0.36          | 33.99                             | -                                 | -                                 | -                                     | -                                    | -          | -        |
| NSO           | PGS_CTD8_150111              | 595940  | 460092    | 4                                  | 0.53           | 33.90                             | 26.705                            | 0.197                             | 0.795                                 | 43.01                                | 2.00       | 2.20     |
|               |                              | 595940  | 460092    | 38                                 | -0.19          | 33.99                             | -                                 | -                                 | -                                     | -                                    | -          | -        |
| NSO           | PGS_CTD10_150111             | 595932  | 455931    | 4                                  | 0.53           | 33.89                             | 26.257                            | 0.288                             | 6.56                                  | 43.81                                | 2.00       | 2.27     |
|               |                              | 595932  | 455931    | 35                                 | -0.01          | 34.00                             | -                                 | -                                 | -                                     | -                                    | -          | -        |
| NSO           | PGS_CTD11_150112             | 595938  | 455824    | 4                                  | 0.45           | 33.91                             | 28.975                            | 0.209                             | 1.342                                 | 48.99                                | 2.08       | -        |
|               |                              | 595938  | 455824    | 35                                 | 0.02           | 33.97                             | -                                 | -                                 | -                                     | -                                    | -          | -        |
| NSO           | PGS_CTD12_150112             | 595931  | 455515    | 4                                  | 0.40           | 33.91                             | 24.061                            | 0.257                             | 5.375                                 | 47.38                                | 1.78       | 5.60     |
|               |                              | 595931  | 455515    | 36                                 | -0.22          | 34.00                             | -                                 | -                                 | -                                     | -                                    | -          | -        |
| NSO           | PGS_CTD14_150112             | 595937  | 455495    | 4                                  | 0.51           | 33.88                             | 28.187                            | 0.229                             | 0.522                                 | 53.58                                | 1.99       | 4.21     |
|               |                              | 595937  | 455495    | 38                                 | 0.01           | 34.00                             | -                                 | -                                 | -                                     | -                                    | -          | -        |
| NSO           | PGS_CTD15_150112             | 595952  | 455504    | 4                                  | 0.79           | 33.91                             | 25.49                             | 0.222                             | 0.884                                 | 51.72                                | 1.88       | 3.96     |
|               |                              | 595952  | 455504    | 39                                 | -0.33          | 34.03                             | -                                 | -                                 | -                                     | -                                    | -          | -        |

|     |                  |        |        |    |       |       |        |       |       |       |      |      |
|-----|------------------|--------|--------|----|-------|-------|--------|-------|-------|-------|------|------|
| NSO | PGS_CTD17_150112 | 600056 | 455265 | 4  | 0.86  | 34.09 | 29.96  | 0.195 | 0.367 | 55.51 | 2.23 | 3.82 |
|     |                  | 600056 | 455265 | 40 | -0.37 | 33.99 | -      | -     | -     | -     | -    | -    |
| NSO | PGS_CTD18_150113 | 600407 | 454605 | 4  | 0.84  | 33.88 | 27.837 | 0.206 | 0.795 | 47.36 | 2.08 | 3.63 |
|     |                  | 600407 | 454605 | 38 | -0.20 | 33.99 | -      | -     | -     | -     | -    | -    |
| NSO | PGS_CTD20_150114 | 600340 | 453974 | 4  | 0.45  | 33.74 | 28.871 | 0.242 | 1.74  | 48.11 | 2.17 | 3.43 |
|     |                  | 600340 | 453974 | 20 | 0.53  | 33.90 | -      | -     | -     | -     | -    | -    |
| NSO | PGS_CTD21_150114 | 600367 | 454045 | 4  | 0.66  | 33.76 | 24.229 | 0.281 | 4.162 | 55.27 | 1.74 | 4.15 |
| NSO | PGS_CTD22_150115 | 600402 | 454039 | 4  | 0.79  | 33.82 | 24.897 | 0.403 | 9.608 | 44.52 | 1.83 | 5.44 |
|     |                  | 600402 | 454039 | 35 | 0.18  | 34.01 | -      | -     | -     | -     | -    | -    |
| NSO | PGS_CTD23_150115 | 600407 | 454099 | 4  | 0.91  | 33.85 | -      | -     | -     | -     | -    | -    |
| SSO | PGS_CTD24_150116 | 611142 | 430133 | 4  | -0.67 | 33.29 | 29.901 | 0.16  | 0.955 | 53.92 | 2.33 | 3.28 |
| SSO | PGS_CTD25_150117 | 612236 | 434676 | 4  | -0.88 | 33.13 | 28.975 | 0.152 | 1.027 | 54.37 | 2.15 | 5.26 |
|     |                  | 612236 | 434676 | 54 | -1.48 | 34.08 | -      | -     | -     | -     | -    | -    |
| SSO | PGS_CTD26_150118 | 611953 | 434708 | 4  | -0.74 | 33.18 | 30.184 | 0.16  | 0.967 | 48.79 | 2.23 | 3.17 |
| SSO | PGS_CTD27_150118 | 611839 | 435755 | 4  | -0.84 | 33.19 | 25.841 | 0.144 | 0.862 | 44.87 | 1.92 | 4.21 |
|     |                  | 611839 | 435755 | 29 | -1.06 | 33.84 | -      | -     | -     | -     | -    | -    |
| SSO | PGS_CTD28_150118 | 611457 | 440023 | 4  | -     | -     | 32.232 | 0.152 | 0.974 | 45.72 | 2.46 | 3.14 |
| SSO | PGS_CTD30_150119 | 611362 | 435427 | 4  | -0.82 | 33.15 | 26.338 | 0.159 | 1.218 | 42.95 | 2.01 | 2.63 |
|     |                  | 611362 | 435427 | 44 | -1.28 | 33.99 | -      | -     | -     | -     | -    | -    |
| SSO | PGS_CTD31_150119 | 611378 | 435598 | 4  | -0.78 | 33.14 | 27.141 | 0.16  | 1.564 | 46.86 | 2.08 | 3.65 |
|     |                  | 611378 | 435598 | 44 | -1.49 | 34.09 | -      | -     | -     | -     | -    | -    |
| SSO | PGS_CTD32_150119 | 611393 | 435424 | 4  | -0.80 | 33.16 | 28.438 | 0.178 | 0.939 | 50.07 | 2.15 | 6.83 |
|     |                  | 611393 | 435424 | 75 | -1.69 | 34.22 | -      | -     | -     | -     | -    | -    |
| SSO | PGS_CTD34_150119 | 611342 | 435069 | 4  | -0.78 | 33.15 | 17.691 | 0.17  | 2.492 | 36.20 | 1.44 | 3.75 |
|     |                  | 611342 | 435069 | 50 | -1.51 | 34.10 | -      | -     | -     | -     | -    | -    |

|     |                  |        |        |    |       |       |        |       |       |       |      |       |
|-----|------------------|--------|--------|----|-------|-------|--------|-------|-------|-------|------|-------|
| SSO | PGS_CTD35_150120 | 611373 | 435519 | 4  | -0.89 | 32.99 | 26.181 | 0.161 | 4.749 | 44.70 | 2.10 | 6.01  |
|     |                  | 611373 | 435519 | 40 | -1.43 | 34.04 | -      | -     | -     | -     | -    | -     |
| SSO | PGS_CTD36_150120 | 611531 | 435143 | 4  | -0.93 | 33.10 | 27.332 | 0.167 | 1.552 | 50.04 | 2.15 | 3.10  |
|     |                  | 611531 | 435143 | 66 | -1.62 | 34.23 | -      | -     | -     | -     | -    | -     |
| SSO | PGS_CTD38_150120 | 611458 | 435347 | 4  | -0.79 | 33.16 | 29.124 | 0.176 | 2.366 | 48.08 | 2.54 | 4.02  |
|     |                  | 611458 | 435347 | 51 | -1.54 | 34.10 | -      | -     | -     | -     | -    | -     |
| SSO | PGS_CTD39_150120 | 611416 | 435332 | 4  | -0.79 | 33.15 | 28.789 | 0.185 | 1.362 | 49.72 | 2.15 | 4.55  |
|     |                  | 611416 | 435332 | 69 | -1.62 | 34.21 | -      | -     | -     | -     | -    | -     |
| SSO | PGS_CTD41_150120 | 611557 | 435446 | 4  | -0.68 | 33.15 | 28.67  | 0.208 | 2.569 | 50.68 | 2.12 | 4.37  |
|     |                  | 611557 | 435446 | 69 | -1.61 | 34.24 | -      | -     | -     | -     | -    | -     |
| NSG | PGS_CTD43_150124 | 501475 | 395186 | 4  | 4.62  | 33.73 | 16.75  | 0.336 | 1.355 | 3.07  | 1.11 | 6.27  |
|     |                  | 501475 | 395186 | 13 | 4.24  | 33.76 | -      | -     | -     | -     | -    | -     |
| NSG | PGS_CTD44_150124 | 501535 | 395168 | 4  | 5.19  | 33.76 | 16.578 | 0.236 | 0.771 | 2.48  | 1.41 | 7.72  |
|     |                  | 501535 | 395168 | 21 | 4.10  | 33.76 | -      | -     | -     | -     | -    | -     |
| NSG | PGS_CTD45_150124 | 501625 | 394949 | 4  | 4.91  | 33.76 | 17.722 | 0.291 | 0.591 | 2.02  | 1.09 | 9.05  |
|     |                  | 501625 | 394949 | 21 | 4.07  | 33.76 | -      | -     | -     | -     | -    | -     |
| NSG | PGS_CTD47_150125 | 501571 | 394578 | 4  | 4.82  | 33.75 | 17.155 | 0.303 | 0.781 | 1.51  | 1.03 | 6.35  |
|     |                  | 501571 | 394578 | 20 | 4.24  | 33.76 | -      | -     | -     | -     | -    | -     |
| NSG | PGS_CTD48_150125 | 501549 | 394905 | 4  | 4.87  | 33.75 | 18.588 | 0.373 | 2.344 | 2.02  | 1.26 | 5.21  |
|     |                  | 501549 | 394905 | 25 | 4.67  | 33.76 | -      | -     | -     | -     | -    | -     |
| NSG | PGS_CTD50_150125 | 501682 | 394604 | 4  | 4.86  | 33.75 | 14.651 | 0.273 | 0.753 | 1.84  | 1.18 | 7.00  |
|     |                  | 501682 | 394604 | 28 | 4.38  | 33.76 | -      | -     | -     | -     | -    | -     |
| NSG | PGS_CTD52_150125 | 501626 | 394495 | 4  | 4.89  | 33.75 | 15.812 | 0.259 | 0.679 | 1.89  | 1.34 | 10.13 |
|     |                  | 501626 | 394495 | 48 | 4.16  | 33.76 | -      | -     | -     | -     | -    | -     |
| NSG | PGS_CTD53_150125 | 501675 | 394522 | 4  | 4.94  | 33.75 | 15.121 | 0.247 | 0.36  | 1.96  | 1.29 |       |

|     |                  |        |        |    |      |       |        |       |       |       |      |       |
|-----|------------------|--------|--------|----|------|-------|--------|-------|-------|-------|------|-------|
|     |                  | 501675 | 394522 | 15 | 4.47 | 33.76 | -      | -     | -     | -     | -    | -     |
| NSG | PGS_CTD54_150125 | 501737 | 394555 | 4  | 5.02 | 33.75 | 15.925 | 0.264 | 0.792 | 1.73  | 1.22 | 10.80 |
|     |                  | 501737 | 394555 | 65 | 3.83 | 33.76 | -      | -     | -     | -     | -    | -     |
| NSG | PGS_CTD55_150125 | 502082 | 394721 | 4  | 4.77 | 33.75 | 17.531 | 0.307 | 6.756 | 2.16  | 1.46 | 8.55  |
|     |                  | 502082 | 394721 | 66 | 3.37 | 33.79 | -      | -     | -     | -     | -    | -     |
| NSG | PGS_CTD56_150125 | 502056 | 394914 | 4  | 4.95 | 33.75 | 16.403 | 0.304 | 5.208 | 2.02  | 1.47 | 5.78  |
|     |                  | 502056 | 394914 | 40 | 4.70 | 33.75 | -      | -     | -     | -     | -    | -     |
| WA  | PGS_CTD58_150202 | 643224 | 645319 | 4  | 1.38 | 33.39 | 18.483 | 0.185 | 4.421 | 49.75 | 1.74 | 4.92  |
|     |                  | 643224 | 645319 | 11 | 1.38 | 33.39 | -      | -     | -     | -     | -    | -     |
| WA  | PGS_CTD59_150202 | 643240 | 645186 | 4  | 1.46 | 33.38 | 17.006 | 0.18  | 2.243 | 46.18 | 1.70 | 6.70  |
|     |                  | 643240 | 645186 | 15 | 1.44 | 33.38 | -      | -     | -     | -     | -    | -     |
| WA  | PGS_CTD60_150202 | 643145 | 644885 | 4  | 1.49 | 33.39 | 18.698 | 0.232 | 2.706 | 54.79 | 1.51 | 7.17  |
|     |                  | 643145 | 644885 | 11 | 1.48 | 33.39 | -      | -     | -     | -     | -    | -     |
| WA  | PGS_CTD62_150202 | 643037 | 644964 | 4  | 1.41 | 33.42 | 19.25  | 0.167 | 2.226 | 54.93 | 1.88 | 6.95  |
|     |                  | 643037 | 644964 | 20 | 1.05 | 33.55 | -      | -     | -     | -     | -    | -     |
| WA  | PGS_CTD63_150203 | 643020 | 645361 | 4  | 1.33 | 33.42 | 18.574 | 0.16  | 2.946 | 51.15 | 1.66 | 9.53  |
|     |                  | 643020 | 645361 | 11 | 1.39 | 33.42 | -      | -     | -     | -     | -    | -     |
| WA  | PGS_CTD64_150203 | 642956 | 645046 | 4  | 1.38 | 33.44 | 19.042 | 0.247 | 7.528 | 45.02 | 1.81 | 9.99  |
|     |                  | 642956 | 645046 | 11 | 1.38 | 33.44 | -      | -     | -     | -     | -    | -     |
| WA  | PGS_CTD66_150203 | 642876 | 645159 | 4  | 1.40 | 33.45 | 18.63  | 0.199 | 1.702 | 45.67 | 1.83 | 15.63 |
|     |                  | 642876 | 645159 | 20 | 3.15 | 33.45 | -      | -     | -     | -     | -    | -     |
| WA  | PGS_CTD67_150203 | 642897 | 645494 | 4  | 1.48 | 33.43 | 18.299 | 0.201 | 2.484 | 49.01 | 1.99 | 10.62 |
|     |                  | 642897 | 645494 | 22 | 1.41 | 33.44 | -      | -     | -     | -     | -    | -     |
| WA  | PGS_CTD68_150203 | 642706 | 645344 | 4  | 1.57 | 33.44 | 20.374 | 0.156 | 1.485 | 50.67 | 2.02 | 14.30 |
|     |                  | 642706 | 645344 | 22 | 1.40 | 33.45 | -      | -     | -     | -     | -    | -     |

---

**Table 2.** Biological variables measured during the PEGASO cruise. Station code: station number and date. Depth (m): surface -4m- and the DCM. V1, V2, and V3: abundances of the different fluorescent-class fractions of the viral counts. Total VA: total viral abundance accounting for all fluorescent classes. VPR: Viral-Prokaryote ratio. Prokaryote Ab.: Prokaryote Abundance. PHP: Prokaryotic heterotrophic production. Chl-a: Chlorophyll a concentration. RAPD: indicates the samples from which analysis of fingerprinting (Randomly Amplified Polymorphic DNA) were performed. See explanation in Figure 1 for acronyms.

| Sampling site | Sample code (PEGASO_station number_date[year/month/day]) | Depth (m) | V1 (10 <sup>6</sup> mL <sup>-1</sup> ) | V2 (10 <sup>6</sup> mL <sup>-1</sup> ) | V3 (10 <sup>6</sup> mL <sup>-1</sup> ) | Total VA (10 <sup>6</sup> mL <sup>-1</sup> ) | VPR   | Prokaryote Ab. (10 <sup>5</sup> mL <sup>-1</sup> ) | PHP (µg C l <sup>-1</sup> d <sup>-1</sup> ) | Chl-a (µg L <sup>-1</sup> ) | RAPD |
|---------------|----------------------------------------------------------|-----------|----------------------------------------|----------------------------------------|----------------------------------------|----------------------------------------------|-------|----------------------------------------------------|---------------------------------------------|-----------------------------|------|
| NSO           | PGS_CTD3_150110                                          | 4         | 2.08                                   | 1.48                                   | 0.28                                   | 3.82                                         | 16.71 | 2.29                                               | 0.48                                        | 1.98                        | -    |
| NSO           | PGS_CTD4_150110                                          | 4         | 1.87                                   | 1.49                                   | 0.32                                   | 3.66                                         | 18.96 | 1.93                                               | 0.35                                        | 1.62                        | Yes  |
|               |                                                          | 68        | 1.07                                   | 1.03                                   | 0.19                                   | 2.27                                         | 7.72  | 2.94                                               | 0.27                                        | 0.92                        | Yes  |
| NSO           | PGS_CTD6_150111                                          | 4         | 4.27                                   | 3.46                                   | 0.31                                   | 7.94                                         | 28.80 | 2.76                                               | 0.81                                        | 1.81                        | Yes  |
|               |                                                          | 45        | 1.99                                   | 1.20                                   | 0.16                                   | 3.32                                         | 10.30 | 3.22                                               | 0.26                                        | 1.96                        | Yes  |
| NSO           | PGS_CTD7_150111                                          | 4         | 5.35                                   | 4.01                                   | 0.50                                   | 9.79                                         | 60.98 | 1.61                                               | 0.78                                        | 1.82                        | -    |
|               |                                                          | 38        | 2.01                                   | 1.68                                   | 0.29                                   | 3.95                                         | 23.18 | 1.70                                               | 0.36                                        | 1.75                        | -    |
| NSO           | PGS_CTD8_150111                                          | 4         | 4.23                                   | 2.97                                   | 0.38                                   | 7.51                                         | 44.32 | 1.70                                               | 0.75                                        | 1.93                        | -    |
|               |                                                          | 38        | 3.77                                   | 3.53                                   | 0.74                                   | 7.97                                         | 53.21 | 1.50                                               | 0.24                                        | 1.95                        | -    |
| NSO           | PGS_CTD10_150111                                         | 4         | 1.70                                   | 1.25                                   | 0.16                                   | 3.09                                         | 19.37 | 1.60                                               | 0.45                                        | 2.21                        | Yes  |
|               |                                                          | 35        | 1.63                                   | 1.13                                   | 0.20                                   | 2.94                                         | 15.45 | 1.90                                               | 0.32                                        | 1.95                        | Yes  |
| NSO           | PGS_CTD11_150112                                         | 4         | 2.66                                   | 1.98                                   | 0.36                                   | 4.96                                         | 16.84 | 2.95                                               | 0.46                                        | 2.07                        | -    |
|               |                                                          | 35        | 1.95                                   | 1.44                                   | 0.29                                   | 3.65                                         | 14.47 | 2.52                                               | 0.25                                        | 1.82                        | -    |
| NSO           | PGS_CTD12_150112                                         | 4         | 2.09                                   | 1.49                                   | 0.31                                   | 3.86                                         | 13.96 | 2.77                                               | 0.50                                        | 2.19                        | -    |
|               |                                                          | 36        | 1.30                                   | 1.18                                   | 0.24                                   | 2.70                                         | 8.95  | 3.02                                               | 0.26                                        | 1.43                        | -    |
| NSO           | PGS_CTD14_150112                                         | 4         | 1.39                                   | 1.81                                   | 0.29                                   | 3.47                                         | 13.76 | 2.52                                               | 0.46                                        | 1.93                        | Yes  |
|               |                                                          | 38        | 1.07                                   | 0.97                                   | 0.20                                   | 2.23                                         | 8.47  | 2.63                                               | 0.15                                        | 1.67                        | Yes  |
| NSO           | PGS_CTD15_150112                                         | 4         | 1.14                                   | 0.83                                   | 0.17                                   | 2.12                                         | 9.21  | 2.30                                               | 0.36                                        | 1.58                        | -    |
|               |                                                          | 39        | 0.20                                   | 0.19                                   | 0.02                                   | 0.41                                         | 1.52  | 2.67                                               | 0.31                                        | 1.17                        | -    |
| NSO           | PGS_CTD17_150112                                         | 4         | 2.26                                   | 1.70                                   | 0.27                                   | 4.20                                         | 18.24 | 2.30                                               | 0.39                                        | 2.11                        | Yes  |



|     |                  |    |       |      |      |      |       |      |      |      |     |
|-----|------------------|----|-------|------|------|------|-------|------|------|------|-----|
|     |                  | 40 | 0.18  | 0.19 | 0.02 | 0.39 | 1.55  | 2.50 | 0.24 | 0.78 | Yes |
| NSO | PGS_CTD18_150113 | 4  | 1.74  | 1.17 | 0.23 | 3.11 | 10.93 | 2.85 | 0.62 | 2.05 | Yes |
|     |                  | 38 | 1.19  | 0.94 | 0.12 | 2.23 | 0.00  | 0.00 | 0.34 | 1.39 | -   |
| NSO | PGS_CTD20_150114 | 4  | 1.76  | 1.18 | 0.19 | 3.11 | 14.25 | 2.18 | 0.50 | 1.34 | Yes |
|     |                  | 20 | 2.44  | 1.38 | 0.23 | 4.02 | 13.62 | 2.95 | 0.60 | 1.87 | Yes |
| NSO | PGS_CTD21_150114 | 4  | 1.58  | 1.26 | 0.24 | 3.06 | 12.83 | 2.39 | 0.24 | 1.96 | -   |
| NSO | PGS_CTD22_150115 | 4  | 2.97  | 1.93 | 0.33 | 5.20 | 22.36 | 2.32 | 0.47 | 1.72 | Yes |
|     |                  | 35 | 1.39  | 0.91 | 0.17 | 2.45 | 9.45  | 2.59 | 0.28 | 1.78 | Yes |
| NSO | PGS_CTD23_150115 | 4  | 1.68  | 1.58 | 0.19 | 3.42 | -     | -    | -    | 1.82 | -   |
| SSO | PGS_CTD24_150116 | 4  | 0.46  | 0.63 | 0.09 | 1.18 | 5.17  | 2.27 | 0.89 | 0.28 | Yes |
|     |                  | 46 | -     | -    | -    | -    | -     | -    | -    | 0.38 | -   |
| SSO | PGS_CTD25_150117 | 4  | 1.81  | 1.58 | 0.17 | 3.53 | 13.92 | 2.53 | 0.37 | 0.34 | Yes |
|     |                  | 54 | 1.59  | 1.79 | 0.23 | 3.60 | 8.27  | 4.35 | 0.64 | 0.36 | Yes |
| SSO | PGS_CTD26_150118 | 4  | 0.91  | 1.14 | 0.16 | 2.20 | 9.08  | 2.42 | 0.25 | 0.36 | -   |
| SSO | PGS_CTD27_150118 | 4  | 1.14  | 1.26 | 0.10 | 2.48 | 6.86  | 3.62 | 0.33 | 0.45 | Yes |
|     |                  | 29 | 1.29  | 1.39 | 0.21 | 2.86 | 6.49  | 4.41 | 1.00 | 0.44 | -   |
| SSO | PGS_CTD28_150118 | 4  | 19.16 | 1.39 | 0.79 | 1.17 | 3.90  | 3.00 | 0.08 | 0.45 | -   |
|     |                  | 70 | -     | -    | -    | -    | -     | -    | -    | 0.29 | -   |
| SSO | PGS_CTD30_150119 | 4  | 3.40  | 2.98 | 0.27 | 6.59 | 24.97 | 2.64 | 0.35 | 0.28 | Yes |
|     |                  | 44 | 3.02  | 2.72 | 0.54 | 6.23 | 16.00 | 3.89 | 0.57 | 0.31 | -   |
| SSO | PGS_CTD31_150119 | 4  | 1.09  | 0.95 | 0.16 | 2.18 | 8.79  | 2.48 | 0.27 | 0.30 | -   |
|     |                  | 44 | 1.56  | 1.62 | 0.32 | 3.47 | 9.06  | 3.84 | 0.25 | 0.84 | -   |
| SSO | PGS_CTD32_150119 | 4  | 1.70  | 1.33 | 0.16 | 3.17 | 13.73 | 2.31 | 0.17 | 0.29 | -   |
|     |                  | 75 | 2.02  | 2.19 | 0.34 | 4.51 | 27.09 | 1.66 | 0.14 | 0.66 | -   |
| SSO | PGS_CTD34_150119 | 4  | 2.90  | 2.14 | 0.18 | 5.17 | 21.95 | 2.36 | 0.44 | 0.29 | Yes |

|     |                  |    |       |       |      |       |       |      |      |       |     |
|-----|------------------|----|-------|-------|------|-------|-------|------|------|-------|-----|
|     |                  | 50 | 1.37  | 1.40  | 0.22 | 2.97  | 6.35  | 4.67 | 0.17 | 0.32  | Yes |
| SSO | PGS_CTD35_150120 | 4  | 2.59  | 1.38  | 0.13 | 4.06  | 13.73 | 2.96 | 0.22 | 0.29  | -   |
|     |                  | 40 | 2.00  | 1.72  | 0.29 | 3.98  | 8.07  | 4.93 | 0.10 | 0.31  | -   |
| SSO | PGS_CTD36_150120 | 4  | 1.71  | 1.21  | 0.18 | 3.08  | 11.01 | 2.80 | 0.19 | 0.28  | -   |
|     |                  | 66 | 1.30  | 1.43  | 0.32 | 3.03  | 11.31 | 2.68 | 0.29 | 0.48  | -   |
| SSO | PGS_CTD38_150120 | 4  | 1.17  | 0.75  | 0.11 | 2.02  | 4.05  | 4.98 | 0.27 | 0.28  | Yes |
|     |                  | 51 | 1.02  | 0.87  | 0.18 | 2.06  | 4.67  | 4.40 | 0.29 | 0.59  | -   |
| SSO | PGS_CTD39_150120 | 4  | 1.26  | 1.22  | 0.22 | 2.69  | 8.57  | 3.14 | 0.37 | 0.28  | -   |
|     |                  | 69 | 1.59  | 1.27  | 0.28 | 3.12  | 8.30  | 3.75 | 0.52 | 0.61  | -   |
| SSO | PGS_CTD41_150120 | 4  | 0.88  | 0.65  | 0.13 | 1.65  | 5.12  | 3.22 | 0.20 | 0.30  | -   |
|     |                  | 69 | 1.36  | 1.07  | 0.20 | 2.61  | 8.92  | 2.93 | 0.00 | 0.45  | -   |
| NSG | PGS_CTD43_150124 | 4  | 9.00  | 7.40  | 1.48 | 17.77 | 24.59 | 7.23 | 0.94 | 8.95  | Yes |
|     |                  | 13 | 4.76  | 6.90  | 1.60 | 13.22 | 21.69 | 6.10 | 0.93 | 9.65  | Yes |
| NSG | PGS_CTD44_150124 | 4  | 6.75  | 6.92  | 1.60 | 15.17 | 32.88 | 4.61 | 0.53 | 4.55  | -   |
|     |                  | 21 | 5.16  | 6.85  | 2.03 | 13.98 | 30.22 | 4.63 | 0.81 | 14.72 | -   |
| NSG | PGS_CTD45_150124 | 4  | 3.96  | 5.51  | 1.66 | 11.10 | 26.13 | 4.25 | 0.95 | 5.74  | Yes |
|     |                  | 21 | 5.28  | 6.87  | 1.92 | 14.01 | 32.86 | 4.26 | 0.85 | 10.07 | -   |
| NSG | PGS_CTD47_150125 | 4  | 7.42  | 7.17  | 1.36 | 15.85 | 37.10 | 4.27 | 1.08 | 6.69  | -   |
|     |                  | 20 | 8.34  | 7.54  | 1.55 | 17.34 | 39.89 | 4.35 | 1.15 | 9.55  | -   |
| NSG | PGS_CTD48_150125 | 4  | 6.40  | 5.57  | 1.07 | 12.96 | 22.59 | 5.74 | 0.89 | 3.75  | -   |
|     |                  | 25 | 4.00  | 3.58  | 0.84 | 8.38  | 16.06 | 5.22 | 0.90 | 6.17  | -   |
| NSG | PGS_CTD50_150125 | 4  | 17.49 | 24.06 | 4.58 | 45.89 | 87.50 | 5.24 | 0.54 | 5.62  | -   |
|     |                  | 28 | 11.63 | 15.71 | 3.40 | 30.58 | 86.97 | 3.52 | 0.63 | 8.40  | -   |
| NSG | PGS_CTD52_150125 | 4  | 9.62  | 17.36 | 4.23 | 31.10 | 59.94 | 5.19 | 1.25 | 5.41  | -   |
|     |                  | 48 | 10.43 | 13.56 | 2.66 | 26.52 | 53.81 | 4.93 | 1.88 | 7.35  | -   |
| NSG | PGS_CTD53_150125 | 4  | 13.71 | 15.01 | 2.12 | 30.59 | 62.75 | 4.87 | 1.73 | 5.45  | -   |

|     |                  |    |       |       |      |       |       |      |      |      |     |
|-----|------------------|----|-------|-------|------|-------|-------|------|------|------|-----|
|     |                  | 15 | 11.17 | 13.86 | 2.21 | 27.33 | 53.81 | 5.08 | 1.58 | 6.77 | -   |
| NSG | PGS_CTD54_150125 | 4  | 11.82 | 15.55 | 3.22 | 30.38 | 55.32 | 5.49 | 1.94 | 2.18 | -   |
|     |                  | 65 | 5.32  | 5.51  | 1.39 | 12.17 | 20.63 | 5.90 | 1.98 | 3.53 | -   |
| NSG | PGS_CTD55_150125 | 4  | 4.09  | 7.31  | 1.62 | 12.95 | 20.44 | 6.33 | 1.07 | 5.31 | -   |
|     |                  | 66 | 5.16  | 5.43  | 0.89 | 11.40 | 17.14 | 6.65 | 1.72 | 6.06 | Yes |
| NSG | PGS_CTD56_150125 | 4  | 4.86  | 6.90  | 0.96 | 12.65 | 19.48 | 6.50 | 0.57 | 1.92 | -   |
|     |                  | 40 | 5.31  | 5.75  | 0.61 | 11.62 | 15.94 | 7.29 | 0.95 | 3.53 | -   |
| WA  | PGS_CTD58_150202 | 4  | 6.37  | 6.03  | 0.65 | 12.96 | 30.89 | 4.19 | 0.49 | 4.91 | -   |
|     |                  | 11 | 5.46  | 4.99  | 0.57 | 10.94 | 47.74 | 2.29 | 0.38 | 5.30 | -   |
| WA  | PGS_CTD59_150202 | 4  | 8.54  | 7.32  | 0.45 | 16.14 | 68.18 | 2.37 | 0.37 | 3.65 | -   |
|     |                  | 15 | 4.80  | 4.03  | 0.59 | 9.35  | 33.30 | 2.81 | 0.28 | 4.31 | -   |
| WA  | PGS_CTD60_150202 | 4  | 4.05  | 4.70  | 0.64 | 9.31  | 24.72 | 3.77 | 0.32 | 4.61 | -   |
|     |                  | 11 | 3.59  | 4.06  | 0.57 | 8.15  | 22.08 | 3.69 | 0.26 | 4.38 | -   |
| WA  | PGS_CTD62_150202 | 4  | 3.26  | 4.22  | 0.59 | 8.03  | 21.58 | 3.72 | 0.27 | 3.91 | Yes |
|     |                  | 20 | 3.38  | 4.57  | 0.74 | 8.64  | 16.43 | 5.26 | 0.14 | 1.97 | Yes |
| WA  | PGS_CTD63_150203 | 4  | 6.77  | 7.57  | 0.97 | 15.18 | 59.80 | 2.54 | 0.13 | 3.41 | -   |
|     |                  | 11 | 1.36  | 1.71  | 0.23 | 3.28  | 12.31 | 2.66 | 0.15 | 3.24 | -   |
| WA  | PGS_CTD64_150203 | 4  | 6.71  | 4.90  | 0.87 | 12.40 | 48.71 | 2.55 | 0.35 | 4.28 | -   |
|     |                  | 11 | 5.95  | 4.87  | 0.65 | 11.37 | 46.42 | 2.45 | 0.31 | 3.93 | -   |
| WA  | PGS_CTD66_150203 | 4  | 7.16  | 5.30  | 0.59 | 12.93 | 54.09 | 2.39 | 0.34 | 4.14 | Yes |
|     |                  | 20 | 8.13  | 5.67  | 1.06 | 14.77 | 59.93 | 2.47 | 0.30 | 3.97 | Yes |
| WA  | PGS_CTD67_150203 | 4  | 6.98  | 4.47  | 0.21 | 11.50 | 24.86 | 4.64 | 0.43 | 3.90 | -   |
|     |                  | 22 | -     | -     | -    | -     | -     | 4.66 | 0.32 | 2.66 | -   |
| WA  | PGS_CTD68_150203 | 4  | 11.03 | 10.72 | 1.16 | 22.72 | 52.24 | 4.35 | 0.52 | 3.67 | -   |
|     |                  | 22 | 15.16 | 12.79 | 1.36 | 29.09 | 66.25 | 4.39 | 0.28 | 3.64 | -   |

---

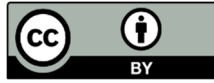

© 2020 by the authors. Submitted for possible open access publication under the terms and conditions of the Creative Commons Attribution (CC BY) license (<http://creativecommons.org/licenses/by/4.0/>).
